# Supplementary material for: Phylogenomic analysis of 20S proteasome gene family reveals stress-responsive patterns in rapeseed (Brassica napus L.)
Source: Front Plant Sci. 2022 Oct 31;13:1037206. doi: 10.3389/fpls.2022.1037206 (PMC9659873; doi:10.3389/fpls.2022.1037206)
Supplement: Supplementary file 1 [file DataSheet_1.xlsx]

## Sheet: Front Page
Phylogenomic Analysis of 20S Proteasome Gene Family Reveals Stress-responsive Patterns in Rapeseed (Brassica napus L.)
Vivek Kumar1, Hemant Sharma2, Lalita Saini1, Archasvi Tyagi1, Pooja Jain1, Yogita Singh3, Priyanka Balyan4, Sachin Kumar2, Sofora Jan5, Reyazul Rouf Mir5, Ivica Djalovic6, Krishna Pal Singh7&8, Upendra Kumar3*, Vijai Malik1*
1Department of Botany, Chaudhary Charan Singh University, Meerut – 250004 (UP) India
2Department of Genetics and Plant Breeding, Chaudhary Charan Singh University, Meerut – 250004 (UP) India
3Department of Molecular Biology & Biotechnology, College of Biotechnology, CCS Haryana Agricultural University, Hisar, India
4Department of Botany, Deva Nagri P.G. College, CCS University, Meerut-250001, India
5Division of Genetics and Plant Breeding, Faculty of Agriculture, SKUAST-Kashmir, Wadura-193201, India
6Institute of Field and Vegetable Crops, National Institute of the Republic of Serbia, Maxim Gorki 30, Novi Sad, Serbia
7Biophysics Unit, College of Basic Sciences & Humanities, GB Pant University of Agriculture & Technology, Pantnagar, 263145, India
8Vice-Chancellor’s Secretariat, Mahatma Jyotiba Phule Rohilkhand University, Bareilly-243001, India
*Corresponding authors
Dr. Upendra Kumar, Email: baliyan.upendra@gmail.com
Dr. Vijai Malik, Email: gathwalajai@gmail.com

## Sheet: ST-1
Supplementary table 1- : Gene, cDNA and CDS sequences for α- and β-subunits of 20S proteasome in Brassica napus in relation to rice and Arabidopsis.
Brassica napus gene				Rice gene				Arabidopsis gene
Name	Size of genes (bp)	Size of cDNAs (bp)	Size of CDSs (bp)	Name	Size of Genes (bp)	Size of cDNAs (bp)	Size of CDSs (bp)	Name	Size of Gene (bp)	size of cDNAs (bp)	Size of CDSs (bp)
α-subunits
BnPAA1-A07	1909	1017	741	OsPAA1	2453	1047	741	AtPAA1	2452	1365	741
BnPAA1-C07	1927	1057	792
BnPAA2-A03	2021	1109	735	OsPAA2	4485	1609	762	AtPAA2	2813	1202	741
BnPAA2-C03	1882	1022	741
BnPAB1-A07	2295	1228	708	OsPAB1	4412	1133	708	AtPAB1	2938	1196	708
BnPAB1-C06	2321	1305	708
BnPAB1-A02	2478	1433	708
BnPAB2-A07	2671	1168	924	OsPAB2	4204	995	708	AtPAB2	2452	1114	708
BnPAB2-C06	2476	1379	708
BnPAB2-C02	2580	1198	963
BnPAC1-A01	1361	1214	606	OsPAC1/ OsPAC2/ OSPAC3	1077/ 1077/ 956	1077/ 1077/ 956	753/753	AtPAC1	1714	1225	753
BnPAC1-C01	1418	1271	606
BnPAC2-Ann	1529	1403	627					AtPAC2	1551	908	627
BnPAC2-C05	1039	950	606
BnPAD1-A09	1778	1046	753	OsPAD1	2195	949	750	AtPAD1	2209	1301	753
BnPAD1-C09	1359	852	852
BnPAD1-C08	1886	977	753	OsPAD2	3996	1040	750	AtPAD2	1602	1122	753
BnPAD2-A03	1632	1067	753
BnPAD2-C07	1585	970	753
BnPAE1-A06	5091	2355	2199	OsPAE1	4304	1187	714	AtPAE1	2586	1179	714
BnPAE1-C06	5449	2128	1932
BnPAE1-A08	5285	1100	843
BnPAE2-A05	1992	1266	735					AtPAE2	2322	1286	714
BnPAE2-C06	2018	1372	753
BnPAE2-C03	3733	1066	852
BnPAF1-A09	2084	1183	828	OsPAF1	3416	1078	813	AtPAF1	2084	1237	834
BnPAF1-C09	2115	1177	834
BnPAF1-C04	1656	1147	816
BnPAF2-A08	1845	1073	822					AtPAF2	2113	1244	837
BnPAF2-C08	1947	1269	822
BnPAF2-A02	1609	997	816
BnPAG1-A04	2014	1090	750	OsPAG1	4148	1141	750	AtPAG1	2737	1355	750
BnPAG1-C04	2042	1091	750
BnPAG2-C04	2174	1203	750	OsPAG2	4419	1188	750
BnPAG2-A07	2087	1150	750
β-subunits
BnPBA1-A01	2444	1049	702	OsPBA1	3530	1065	741	AtPBA1	2411	1106	702
BnPBA1-C01	2525	953	702
BnPBA1-A03	2109	930	702	OsPBA2	3357	999	741
BnPBA2-A08	2227	1121	702
BnPBA2-C07	2113	934	702
BnPBA2-C03	2255	1082	702
BnPBB1-A06	3869	1818	1578	OsPBB1	3111	1194	819	AtPBB1	2990	1394	822
BnPBB1-C07	5132	1207	996
BnPBB2-A02	2466	1253	822					AtPBB2	2478	1252	807
BnPBB2-C02	2280	1156	987
BnPBC1-A07	1883	896	615	OsPBC1	3374	1038	615	AtPBC1	2294	1137	615
BnPBC1-C07	1942	1046	621
BnPBC1-A06	1875	966	615
BnPBC1-C05	1809	958	615
BnPBC1-Ann	1514	683	576
BnPBC2-Ann	1767	934	576	OsPBC2	2500	877	615	AtPBC2	2109	1047	615
BnPBC2-Cnn	3102	249	249
BnPBC2-A02	2354	1072	576
BnPBD1-A01	1606	792	615	OsPBD1	2346	968	639	AtPBD1	1323	872	615
BnPBD1-C01	1553	849	645
BnPBD1-A08	1509	810	615
BnPBD1-C08	1520	776	615
BnPBD1-A05	1674	945	678
BnPBD1-C04	1564	746	537
BnPBD2-A05	1569	799	615					AtPBD2	2397	1336	600
BnPBD2-C05	1756	814	615
BnPBD2-A01	618	507	507
BnPBD2-Cnn	1264	606	606
BnPBE1-A03	899	498	405	OsPBE1	2943	1217	834	AtPBE1	2711	1394	822
BnPBE1-C03	2345	1430	825
BnPBE1-A06	2247	1280	825
BnPBE1-C05	2355	1333	825					AtPBE2	2621	1253	822
BnPBE2-A08	2319	1326	825
BnPBE2-C08	2050	1041	825
BnPBE2-A09	2358	1359	825
BnPBF1-A09	1275	785	672	OsPBF1	3440	1039	666	AtPBF1	2171	1071	672
BnPBF1-C08	1453	921	672
BnPBF1-Cnn	1624	985	672	OsPBF2	2186	1063	660
BnPBF2-A07	1638	1018	672
BnPBF2-C07	1324	809	672
BnPBF2-A04	1373	908	672
BnPBG1-A09	2091	1073	738	OsPBG1	2517	1090	771	AtPBG1	2826	1350	741
BnPBG1-C04	2117	1046	738
BnPBG1-A03	1844	702	702
BnPBG1-C01	2002	1045	786
BnPBG1-Cnn	1601	1138	738
BnPBG2-A09	2098	1103	738

## Sheet: ST-2
Supplementary table-2. Number of exons and introns in the genes of 20S proteasome family belong to Brassica napus and Arabidopsis thaliana
Brassica napus gene				Arabidopsis thaliana
Gene ID	Gene name	Exon	Intron	Gene name	Exon	Intron
α-Subunits
GSBRNA2T00054275001	BnPAA1-A07	8	7	AtPAA1	9	8
GSBRNA2T00002484001	BnPAA1-C07	8	7
GSBRNA2T00155014001	BnPAA2-A03	8	7	AtPAA2	8	7
GSBRNA2T00096646001	BnPAA2-C03	8	7
GSBRNA2T00099220001	BnPAB1-A07	11	10	AtPAB1	11	10
GSBRNA2T00131975001	BnPAB1-C06	11	10
GSBRNA2T00036591001	BnPAB1-A02	11	10
GSBRNA2T00146374001	BnPAB2-A07	13	12	AtPAB2	12	11
GSBRNA2T00148072001	BnPAB2-C06	13	12
GSBRNA2T00018693001	BnPAB2-C02	11	10
GSBRNA2T00068014001	BnPAC1-A01	4	3	AtPAC1	2	1
GSBRNA2T00006674001	BnPAC1-C01	4	3
GSBRNA2T00084291001	BnPAC2-Ann	2	1
GSBRNA2T00063942001	BnPAC2-C05	2	1
GSBRNA2T00129258001	BnPAD1-A09	3	2	AtPAD1	3	2
GSBRNA2T00134993001	BnPAD1-C09	4	3
GSBRNA2T00109342001	BnPAD1-C08	3	2
GSBRNA2T00151309001	BnPAD2-A03	3	2	AtPAD2	3	2
GSBRNA2T00041741001	BnPAD2-C07	3	2
GSBRNA2T00024610001	BnPAE1-A06	17	16	AtPAE1	10	9
GSBRNA2T00062317001	BnPAE1-C06	15	14
GSBRNA2T00114135001	BnPAE1-A08	11	10
GSBRNA2T00125516001	BnPAE2-A05	8	7	AtPAE2	10	9
GSBRNA2T00004260001	BnPAE2-C06	8	7
GSBRNA2T00033024001	BnPAE2-C03	11	10
GSBRNA2T00006807001	BnPAF1-A09	2	1	At PAF1	2	1
GSBRNA2T00100720001	BnPAF1-C09	2	1
GSBRNA2T00148463001	BnPAF1-C04	2	1
GSBRNA2T00095005001	BnPAF2-A08	2	1	AtPAF2	2	1
GSBRNA2T00087703001	BnPAF2-C08	2	1
GSBRNA2T00114023001	BnPAF2-A02	2	1
GSBRNA2T00089005001	BnPAG1-A04	9	8	AtPAG1	10	9
GSBRNA2T00148350001	BnPAG1-C04	10	9
GSBRNA2T00118631001	BnPAG2-A07	10	9
GSBRNA2T00127632001	BnPAG2-C04	9	8
β-subunits
GSBRNA2T00039990001	BnPBA1-A01	8	7	AtPBA1	8	7
GSBRNA2T00130426001	BnPBA1-C01	8	7
GSBRNA2T00077700001	BnPBA1-A03	8	7
GSBRNA2T00021863001	BnPBA2-A08	8	7
GSBRNA2T00099782001	BnPBA2-C07	8	7
GSBRNA2T00062096001	BnPBA2-C03	8	7
GSBRNA2T00078136001	BnPBB1-A06	12	11	AtPBB1	9	8
GSBRNA2T00139399001	BnPBB1-C07	10	9
GSBRNA2T00056120001	BnPBB2-A02	8	7	AtPBB2	9	8
GSBRNA2T00117490001	BnPBB2-C02	9	8
GSBRNA2T00112266001	BnPBC1-A07	6	5	AtPBC1	7	6
GSBRNA2T00110027001	BnPBC1-C07	7	6
GSBRNA2T00125483001	BnPBC1-A06	7	6
GSBRNA2T00119267001	BnPBC1-C05	7	6
GSBRNA2T00013695001	BnPBC1-Ann	6	5
GSBRNA2T00066809001	BnPBC2-Ann	6	5	AtPBC2	7	6
GSBRNA2T00071922001	BnPBC2-Cnn	3	2
GSBRNA2T00065751001	BnPBC2-A02	6	5
GSBRNA2T00043634001	BnPBD1-A01	3	2	AtPBD1	3	2
GSBRNA2T00075352001	BnPBD1-C01	4	3
GSBRNA2T00097244001	BnPBD1-A08	3	2
GSBRNA2T00062922001	BnPBD1-C08	3	2
GSBRNA2T00020601001	BnPBD1-A05	4	3
GSBRNA2T00045708001	BnPBD1-C04	5	4
GSBRNA2T00048424001	BnPBD2-A05	3	2	AtPBD2	3	2
GSBRNA2T00032142001	BnPBD2-C05	3	2
GSBRNA2T00056253001	BnPBD2-A01	3	2
GSBRNA2T00016610001	BnPBD2-Cnn	4	3
GSBRNA2T00138834001	BnPBE1-A03	5	4	AtPBE1	9	8
GSBRNA2T00057037001	BnPBE1-C03	7	6
GSBRNA2T00105377001	BnPBE1-A06	7	6
GSBRNA2T00008950001	BnPBE1-C05	7	6
GSBRNA2T00015255001	BnPBE2-A08	7	6	AtPBE2	8	7
GSBRNA2T00090452001	BnPBE2-C08	7	6
GSBRNA2T00035483001	BnPBE2-A09	7	6
GSBRNA2T00006776001	BnPBF1-A09	7	6	AtPBF1	7	6
GSBRNA2T00155484001	BnPBF1-C08	7	6
GSBRNA2T00019972001	BnPBF1-Cnn	6	5
GSBRNA2T00099039001	BnPBF2-A07	6	5
GSBRNA2T00145037001	BnPBF2-C07	6	5
GSBRNA2T00149209001	BnPBF2-A04	6	5
GSBRNA2T00074642001	BnPBG1-A09	7	6	AtPBG1	7	6
GSBRNA2T00118334001	BnPBG1-C04	7	6
GSBRNA2T00014852001	BnPBG1-A03	8	7
GSBRNA2T00067096001	BnPBG1-C01	6	5
GSBRNA2T00077646001	BnPBG1-Cnn	7	6
GSBRNA2T00073421001	BnPBG2-A09	7	6

## Sheet: ST-3
Supplementary table 3. Simple sequence repeats (SSRs) in BnPA and BnPB genes in tetraploid Brassica napus
Gene name	SSR motif	Number of SSR	Position
α-Subunits
BnPAA2-A03	A-rich, (A)n	2	15-57, 58-76
BnPAA2-C03	(A)n	1	73-104
BnPAB1-C06	(T)n	1	1249-1277
BnPAB2-A07	(AT)n	1	1756-1772
BnPAB2-C02	(TC)n	1	1062-1086
BnPAD1-C09	(A)n	1	167 - 185
BnPAD2-C07	A-rich	1	13-56
BnPAE1-A06	(GAA)n	1	632-650
BnPAE1-C06	A-rich, (GGGTTTA)n	2	1044-1098, 2424-2571
BnPAE1-A08	(TATATT)n, (ATAA)n, (TATT)n, (ATTAA)n, (ATTTAGT)n, A-rich	6	83-141, 179-220, 380-408, 574-618, 621-662, 2418-2471
BnPAE2-A05	(TTG)n, (TCTT)n	2	297-342, 896-923
BnPAE2-C03	(TATA)n, (TTTGTT)n, (AGTCTA)n	3	859-927, 1121-1176, 2486-2522
BnPAF1-A09	(CTGTTT)n	1	891-940
BnPAF1-C09	GA-rich, (CTGAGG)n	2	65-97, 1758-1811
BnPAF2-A02	(TTATTT)n	1	519-562
BnPAG2-C04	(CCTCCC)n, (TA)n	2	74-98, 555-575
β-Subunits
BnPBA1-A01	(CTAG)n, (TA)n	2	1182-1205, 1319-1347
BnPBA1-A03	(ATTCTGT)n	1	1093-1137
BnPBA2-C03	(AG)n	1	21-40
BnPBB1-A06	(ATTTAA)n	1	1314-1372
BnPBB1-C07	(TATT)n, (CT)n, (CT)n, (TTAA)n	4	712-745, 1031-1054, 1167-1190, 1601-1653
BnPBB2-C02	(GTGTA)n	1	580-610
BnPBC1-A07	(TGTT)n	1	384-404
BnPBC1-C07	(TGTT)n	1	403-466
BnPBC1-A06	(CT)n, (GTT)n	2	37-64, 885-904
BnPBC1-C05	(CT)n	1	35-54
BnPBC1-Ann	(GTT)n	1	1604-1627
BnPBC2-A02	(TGAA)n	1	1530-1553
BnPBD1-C01	(TC)n	1	200-226
BnPBD1-A08	(TCC)n	1	247-266
BnPBD1-C08	(TGTTAT)n	1	634-683
BnPBD1-A05	(CT)n	1	292-321
BnPBD1-C04	(CT)n	1	279-304
BnPBD2-C05	(TC)n, (ATA)n, (TTTTG)n	3	239-258, 735-766, 1192-1226
BnPBD2-A01	(TC)n	1	172 -193
BnPBD2-Cnn	(TA)n, (TTTATG)n	2	249-281, 879-930
BnPBE1-C03	(TTGTT)n	1	793-863
BnPBE1-A06	(T)n	1	363-383
BnPBE2-A08	(CTT)n	1	24-54
BnPBE2-A09	(CTT)n	1	5&64
BnPBF1-Cnn	(TC)n	1	30-60
BnPBF2-A07	(AG)n, (TC)n	2	15-33, 50-79
BnPBG1-A09	(CTT)n	1	1179-1206
BnPBG1-Cnn	(TTTAT)n	1	1373-1403
BnPBG2-A09	(CT)n	1	236-275

## Sheet: ST-4
Supplementary table 4. Predicted miRNA targets in 21 BnPA and BnPB genes (a solitary miRNA, marked with asterisk, silenced the target gene by translation; all other miRNAs silenced the genes through cleavage)
Genes	miRNA	RNA length with position within the gene (target site)
α-subunits
BnPAA2-C03	bna-miR2111a-3p	21(910-930)
BnPAB1-A02	bna-miR168a	21(811-831)
BnPAB2-C02	bna-miR168a	21(756-776)
BnPAC1-A01	bna-miR166f	21(847-867)
BnPAC1-A01	bna-miR166a	21(847-867)
BnPAC1-A01	bna-miR166b	21(847-867)
BnPAC1-A01	bna-miR166c	21(847-867)
BnPAC1-A01	bna-miR166d	21(847-867)
BnPAC1-A01	bna-miR166e	21(847-867)
BnPAC2-C05	bna-miR6028	21(586-606)
BnPAE1-A06	bna-miR6028	21(265-285)
BnPAE1-C06	bna-miR6028	21(265-285)
BnPAF2-C08	bna-miR395a	21(1001-1021)
BnPAF2-C08	bna-miR395b	21(1001-1021)
BnPAF2-C08	bna-miR395c	21(1001-1021)
β-subunits
BnPBA1-A01	bna-miR397a	22(89-112)
BnPBA1-A01	bna-miR397b	22(89-112)
BnPBA2-C07	bna-miR397a	22(104-127)
BnPBA2-C07	bna-miR397b	22(104-127)
BnPBD1-C08	bna-miR160a	21(225-245)
BnPBD1-C08	bna-miR160b	21(225-245)
BnPBD1-C08	bna-miR160c	21(225-245)
BnPBD1-C08	bna-miR160d	21(225-245)
BnPBD1-A08	bna-miR160a	21(217-237)
BnPBD1-A08	bna-miR160b	21(217-237)
BnPBD1-A08	bna-miR160c	21(217-237)
BnPBD1-A08	bna-miR160d	21(217-237)
BnPBD2-A01	bna-miR2111a-3p	21(172-192)
BnPBD2-A01	bna-miR2111b-3p	21(172-192)
BnPBD2-A01	bna-miR160a	21(134-154)
BnPBD2-A01	bna-miR160b	21(134-154)
BnPBD2-A01	bna-miR160c	21(134-154)
BnPBD2-A01	bna-miR160d	21(134-154)
BnPBD2-Cnn	bna-miR160a	21(144-164)
BnPBD2-Cnn	bna-miR160b	21(144-164)
BnPBD2-Cnn	bna-miR160c	21(144-164)
BnPBD2-Cnn	bna-miR160d	21(144-164)
BnPBE1-C05	bna-miR1140	21(318-338)
BnPBF1-A09	bna-miR6029	21(664-684)
BnPBF1-Cnn	bna-miR6029	21(706-726)
BnPBF1-C08	bna-miR6029	21(700-720)
BnPBF2-C07	bna-miR6029	21(741-761)
BnPBF2-A07	bna-miR6029	21(737-757)
BnPBF2-A04	bna-miR6029	21(669-689)

## Sheet: ST-5
Supplementary table 5. Physiochemical properties of 82 BnPA/BnPB proteins encoded by all genes
S.No.	Name of Protein	Molecular weight (D)	Theoretical pI	Negatively charged residues	Positively charged residues	Instability index	Aliphatic index	Hydropathicity (Gravy)	Stability
α-Subunits
1	BnPAA1-A07	27327.1	5.59	34	28	49.57	79.72	-0.283	Unstable
2	BnPAA1-C07	27327.1	5.59	34	28	49.57	79.72	-0.283	Unstable
3	BnPAA2-A03	29404.5	5.79	35	29	47.56	76.43	-0.265	Unstable
4	BnPAA2-C03	27171.9	5.46	35	28	48.88	79.18	-0.3	Unstable
5	BnPAB1-A07	25760.2	5.35	30	25	35.12	87.06	-0.25	Stable
6	BnPAB1-C06	25774.3	5.35	30	25	35.12	87.49	-0.249	Stable
7	BnPAB1-A02	25701.2	5.51	29	25	33.73	89.15	-0.196	Stable
8	BnPAB2-A07	35621.7	6.15	38	36	36.12	83.12	-0.194	Stable
9	BnPAB2-C06	33809.7	6.36	36	35	36.27	85.37	-0.152	Stable
10	BnPAB2-C02	25701.2	5.51	29	25	33.73	89.15	-0.196	Stable
11	BnPAC1-A01	21763.6	6.52	23	22	50.02	88.36	-0.265	Unstable
12	BnPAC1-C01	21753.6	6.52	23	22	49.17	88.36	-0.261	Unstable
13	BnPAC2-Ann	22570.5	6.21	24	22	50	85.87	-0.274	Unstable
14	BnPAC2-C05	22134.9	6.52	23	22	47.63	72.84	-0.449	Unstable
15	BnPAD1-A09	27355.1	7.72	33	34	41.69	91	-0.288	unstable
16	BnPAD1-C09	31229.3	9.93	23	41	54.92	98.52	-0.144	Unstable
17	BnPAD1-C08	27325.1	7.72	33	34	41.35	91.4	-0.278	Unstable
18	BnPAD2-A03	27355.1	7.72	33	34	38.98	90.2	-0.301	Stable
19	BnPAD2-C07	27343.1	7.72	33	34	38.98	89.8	-0.309	Stable
20	BnPAE1-A06	82935.9	8.65	93	100	63.78	72.06	-0.574	Unstable
21	BnPAE1-C06	72232.9	6.09	92	83	61.33	67.81	-0.669	Unstable
22	BnPAE1-A08	31099.3	5.38	40	31	52.42	82.57	-0.31	Unstable
23	BnPAE2-A05	26530	4.65	37	20	44.04	91.07	-0.102	Unstable
24	BnPAE2-C06	27281.9	4.65	37	20	44.99	90.84	-0.077	Unstable
25	BnPAE2-C03	31305.5	5.41	40	32	57.13	83.39	-0.31	Unstable
26	BnPAF1-A09	29966.5	5.08	39	27	50.51	77.71	-0.308	Unstable
27	BnPAF1-C09	30176.8	5.09	39	27	50.64	78.23	-0.289	Unstable
28	BnPAF1-C04	29725.3	5.07	38	26	54.67	79.19	-0.287	Unstable
29	BnPAF2-A08	30169.7	5.03	40	28	55.19	77.55	-0.391	Unstable
30	BnPAF2-C08	30138.7	5.18	39	29	53.93	77.91	-0.383	Unstable
31	BnPAF2-A02	29737.1	4.95	40	26	51.98	77.75	-0.345	Unstable
32	BnPAG1-A04	27363.4	6.11	36	33	44.77	84.26	-0.224	Unstable
33	BnPAG1-C04	27344.4	6.01	36	32	44	84.26	-0.219	Unstable
34	BnPAG2-A07	27363.4	6.11	36	33	44.77	84.26	-0.224	Unstable
35	BnPAG2-C04	27448.5	6.33	36	34	45.7	84.26	-0.241	Unstable
β-Subunits
36	BnPBA1-A01	25141.5	5.18	23	17	31.1	89.53	-0.097	Stable
37	BnPBA1-C01	25141.5	5.18	23	17	31.1	89.53	-0.097	Stable
38	BnPBA1-A03	25109.4	5.18	23	17	32.41	90.77	-0.087	Stable
39	BnPBA2-A08	25141.5	5.18	23	17	31.1	89.53	-0.097	Stable
40	BnPBA2-C07	25097.3	5.18	23	17	32.78	89.1	-0.109	Stable
41	BnPBA2-C03	25127.4	5.18	23	17	30.37	89.1	-0.098	Stable
42	BnPBB1-A06	54741.4	4.68	81	50	31.04	79.6	-0.143	Stable
43	BnPBB1-C07	36477.1	8.37	35	38	32.14	85.68	-0.049	Stable
44	BnPBB2-A02	29605	7.07	30	30	26.48	84.29	-0.126	Stable
45	BnPBB2-C02	36194.6	8.6	34	38	33.78	83.84	-0.131	Stable
46	BnPBC1-A07	23057.5	5.3	28	23	32.82	89.47	-0.052	Stable
47	BnPBC1-C07	22811.2	5.3	28	23	32.47	90.34	-0.058	Stable
48	BnPBC1-A06	22798.2	5.3	28	23	33.42	90.34	-0.045	Stable
49	BnPBC1-C05	22798.2	5.3	28	23	33.42	90.34	-0.045	Stable
50	BnPBC1-Ann	21456.7	5.47	27	23	33.94	90.89	-0.093	Stable
51	BnPBC2-Ann	21442.7	5.46	27	23	33.5	90.89	-0.093	Stable
52	BnPBC2-Cnn	9510.19	8.52	8	10	44.4	96.34	0.093	Unstable
53	BnPBC2-A02	21455.7	5.69	27	24	33.41	90.89	-0.124	Stable
54	BnPBD1-A01	22453.6	6.06	24	21	25.65	92.79	-0.027	Stable
55	BnPBD1-C01	23588.9	5.66	26	21	27.12	96.64	0.042	Stable
56	BnPBD1-A08	22542.7	5.85	25	21	30.19	93.73	-0.05	Stable
57	BnPBD1-C08	22527.7	6.06	24	21	29.03	93.24	-0.049	Stable
58	BnPBD1-A05	24796.3	6.44	24	22	27.48	91.91	0.052	Stable
59	BnPBD1-C04	19793.6	5.81	25	19	31.66	88.2	-0.093	Stable
60	BnPBD2-A05	22596.8	5.74	26	22	33	93.24	-0.061	Stable
61	BnPBD2-C05	22582.7	5.74	26	22	33	92.75	-0.059	Stable
62	BnPBD2-A01	18542.2	5.28	22	16	35.83	100.36	0.065	Stable
63	BnPBD2-Cnn	22485.4	8.93	21	25	43.96	79.15	-0.433	Unstable
64	BnPBE1-A03	14682.7	4.93	16	12	47.64	81.57	-0.003	Unstable
65	BnPBE1-C03	29666.4	5.55	32	26	41.84	67.66	-0.25	Unstable
66	BnPBE1-A06	29592.4	5.71	31	26	40.83	68.72	-0.221	Unstable
67	BnPBE1-C05	29634.5	5.71	31	26	41.14	69.09	-0.222	Unstable
68	BnPBE2-A08	29610.4	5.71	31	26	41.14	67.3	-0.249	Unstable
69	BnPBE2-C08	29579.4	5.54	31	25	40.59	69.09	-0.208	Unstable
70	BnPBE2-A09	29569.3	5.54	31	25	40.59	69.09	-0.205	Unstable
71	BnPBF1-A09	24584	6.51	24	23	42.33	83.14	-0.204	Unstable
72	BnPBF1-C08	24584	6.51	24	23	42.33	83.14	-0.204	Unstable
73	BnPBF1-Cnn	24583.1	6.95	23	23	40.87	83.14	-0.204	Unstable
74	BnPBF2-A07	24597.1	6.95	23	23	40.87	83.14	-0.204	Unstable
75	BnPBF2-C07	24523	6.58	23	22	38.27	83.14	-0.186	Stable
76	BnPBF2-A04	24514	6.51	23	22	39.33	83.14	-0.187	Stable
77	BnPBG1-A09	27522.2	5.98	30	27	32.6	83.55	-0.325	Stable
78	BnPBG1-C04	27544.2	5.89	30	26	33.56	83.55	-0.333	Stable
79	BnPBG1-A03	26404.1	5.97	27	24	41.8	84.89	-0.239	Unstable
80	BnPBG1-C01	29437.5	5.78	31	27	32.96	85.9	-0.244	Stable
81	BnPBG1-Cnn	27582.3	6.31	28	26	34.71	84.73	-0.336	Stable
82	BnPBG2-A09	27542.3	6.22	29	27	32.08	85.55	-0.32	Stable

## Sheet: ST-6
Supplementary table 6- : Details of α- and β-subunit of 20S proteasome in Brassica napus, Rice and Arabidopsis: Number of amino acids (aa) with conserved domains in Brassica napus.
Brassica protein			Rice protein		Arabidopsis protein
Name of protein	No. of amino acid	Domain type	Name of protein	No. of amino acid	Name of protein	No. of amino acid
α-subunits
BnPAA1-A07	246	α-6	OsPAA1	246	AtPAA1	246
BnPAA1-C07	246	α-6
BnPAA2-A03	263	α-6	OsPAA2	253	AtPAA2	246
BnPAA2-C03	244	α-6
BnPAB1-A07	235	α-2	OsPAB1	235	AtPAB1	235
BnPAB1-C06	235	α-2
BnPAB1-A02	235	α-2
BnPAB2-A07	320	α-2	OsPAB2	235	AtPAB2	235
BnPAB2-C06	307	α-2
BnPAB2-C02	235	α-2
BnPAC1-A01	201	Incomplete	OsPAC1/ OsPAC2/ OSPAC3	250/ 250/ 250	AtPAC1/AtPAC2	250/ 208
BnPAC1-C01	201	Incomplete
BnPAC2-Ann	208	Incomplete
BnPAC2-C05	201	Incomplete
BnPAD1-A09	250	α-7	OsPAD1	249	AtPAD1	250
BnPAD1-C09	283	Incomplete
BnPAD1-C08	250	α-7
BnPAD2-A03	250	α-7	OsPAD2	249	AtPAD2	250
BnPAD2-C07	250	α-7
BnPAE1-A06	732	α-5	OsPAE1	237	AtPAE1	237
BnPAE1-C06	643	α-5
BnPAE1-A08	280	α-5
BnPAE2-A05	244	α-5			AtPAE2	237
BnPAE2-C06	250	α-5
BnPAE2-C03	283	α-5
BnPAF1-A09	275	α-1	OsPAF1	270	AtPAF1/ AtPAF2	277/ 278
BnPAF1-C09	277	α-1
BnPAF1-C04	271	α-1
BnPAF2-A08	273	α-1
BnPAF2-C08	273	α-1
BnPAF2-A02	271	α-1
BnPAG1-A04	249	α-3	OsPAG1	249	AtPAG1	249
BnPAG1-C04	249	α-3
BnPAG2-A07	249	α-3	OsPAG2	249
BnPAG2-C04	249	α-3
β-subunits
BnPBA1-A01	233	Β-6	OsPBA1	246	AtPBA1	233
BnPBA1-C01	233	β-6
BnPBA1-A03	233	β-6
BnPBA2-A08	233	β-6	OsPBA2	221
BnPBA2-C07	233	β-6
BnPBA2-C03	233	β-6
BnPBB1-A06	525	β-7	OsPBB1	246	AtPBB1/ AtPBB2	273/ 268
BnPBB1-C07	331	β-7
BnPBB2-A02	273	β-7
BnPBB2-C02	328	β-7
BnPBC1-A07	206	β-3	OsPBC1	272	AtPBC1	204
BnPBC1-C07	204	β-3
BnPBC1-A06	204	β-3
BnPBC1-C05	204	β-3
BnPBC1-Ann	191	β-3
BnPBC2-Ann	191	β-3	OsPBC2	204	AtPBC2	204
BnPBC2-Cnn	82	Incomplete
BnPBC2-A02	191	β-3
BnPBD1-A01	204	β-2	OsPBD1	204	AtPBD1	204
BnPBD1-C01	214	β-2
BnPBD1-A08	204	β-2
BnPBD1-C08	204	β-2
BnPBD1-A05	225	β-2
BnPBD1-C04	178	β-2
BnPBD2-A05	204	β-2			AtPBD2	199
BnPBD2-C05	204	β-2
BnPBD2-A01	168	Incomplete
BnPBD2-Cnn	201	Incomplete
BnPBE1-A03	134	Incomplete	OsPBE1	212	AtPBE1/ AtPBE2	298/ 273
BnPBE1-C03	274	β-5
BnPBE1-A06	274	β-5
BnPBE1-C05	274	β-5
BnPBE2-A08	274	β-5
BnPBE2-C08	274	β-5
BnPBE2-A09	274	β-5
BnPBF1-A09	223	β-1	OsPBF1/ OsPBF2	277/219	AtPBF1	223
BnPBF1-C08	223	β-1
BnPBF1-Cnn	223	β-1
BnPBF2-A07	223	β-1
BnPBF2-C07	223	β-1
BnPBF2-A04	223	β-1
BnPBG1-A09	245	β-4	OsPBG1	256	AtPBG1	246
BnPBG1-C04	245	β-4
BnPBG1-A03	233	β-4
BnPBG1-C01	261	β-4
BnPBG1-Cnn	245	β-4
BnPBG2-A09	245	β-4

## Sheet: ST-7
Supplementary table 7 - List of identified motifs and their sequence in BnPA/ BnPB proteins
S.N.	E-value	Motif sequence	Reported (R) / Novel(N)
1	5.4e-551	KIHKJDDHIGVAASGLAADVR	R
2	6.5e-400	QYDRSVTTFSPEGRLFQVEYA	N
3	1.8e-369	GGLDETGPGLYYTDP	N
4	3.5e- 616	AVKNGTTAVGIKGKBGVVJAADKRASSGL	R
5	3.1e-426	VLVRKARSEAQNHRFTYGEPMPVERLVRRJADLAQ	R
6	1.1e-417	AIGSGSQAAKSFLEKRYKEDM	R
7	7.3e - 231	QLQNGRPLTVKAAANLLRNIL	N
8	5.5e - 229	SATFRDGASGGKLEIYIITPE	N
9	1.1e - 234	ELDEAITTAISILKZGMEEKVSSKNVEIGKVGAD	N
10	1.3e - 224	LDTNKFEPLMPTJVLGGVNBGEDYFGTVPSIGLPFETBFVA	N

## Sheet: ST-8
Supplementary table-8: Amino acid sequence homology (percent identity) among the 20S proteasome alpha(α) subunits of Brassica napus and Arabidopsis thaliana
		BnPAC1-A01	BnPAC1-C01	BnPAC2-C05	AtPAC2	BnPAC2-Ann	AtPAC1	AtPAG1	BnPAG2-C04	BnPAG1-C04	BnPAG2-A07	BnPAG1-A04	BnPAE2-A05	BnPAE2-C06	BnPAE1-A06	BnPAE1-C06	BnPAE2-C03	BnPAE1-A08	AtPAE1	AtPAE2	BnPAF2-C02	BnPAF2-C04	AtPAF1	BnPAF2-A02	BnPAF1-C09	BnPAF1-A09	AtPAF2	BnPAF1-A08	BnPAF1-C08	AtPAA1	AtPAA2	BnPAA1-A03	BnPAA2-C07	BnPAA2-A07	BnPAA1-C03	BnPAB2-A07	BnPAB1-A07	BnPAB1-C06	AtPAB2	BnPAB2-C06	BnPAB1-C02	BnPAB2-A02	AtPAB1	BnPAD1-C09	AtPAD2	AtPAD1	BnPAD2-C08	BnPAD1-A09	BnPAD2-A03
01:00:00	BnPAC1-A01	100	99.5	94.58	89.95	93.97	92.54	27.89	28.42	28.42	28.42	28.42	35	35	35	35	35	35	35	35.56	35.29	30.05	29.53	29.53	29.02	29.53	29.53	30.05	30.57	28.65	27.03	26.32	27.03	27.03	27.03	25.41	25.41	25.41	25.41	25.41	25.41	25.41	25.41	29.94	34.38	34.38	34.9	34.9	35.42
02:00:00	BnPAC1-C01	99.5	100	93.98	89.45	93.47	92.04	27.37	27.89	27.89	27.89	27.89	34.44	34.44	34.44	34.44	34.44	34.44	34.44	35	35.29	30.05	29.53	29.53	29.02	29.53	29.53	30.05	30.57	28.65	27.03	26.32	27.03	27.03	27.03	24.86	24.86	24.86	24.86	24.86	24.86	24.86	24.86	29.94	34.38	34.38	34.9	34.9	35.42
03:00:00	BnPAC2-C05	94.58	93.98	100	89.08	92.53	94.03	27.37	27.89	27.89	27.89	27.89	36.67	36.67	36.67	36.67	36.67	36.67	36.67	37.22	34.83	32.81	32.29	32.29	31.77	32.29	32.29	33.16	33.68	30.94	30.94	29.47	30.94	30.94	30.17	32.43	32.43	32.43	32.43	32.43	32.43	32.43	32.43	30.56	34.38	34.38	34.9	34.9	34.9
04:00:00	AtPAC2	89.95	89.45	89.08	100	92.79	92.31	30.46	29.95	29.95	29.95	29.95	38.5	38.5	38.5	38.5	38.5	38.5	38.5	39.04	36.11	32.5	32	32.5	32	32.5	32	32.5	33	32.12	30.05	29.44	30.05	30.05	30.05	29.17	29.17	29.17	29.17	29.17	29.17	29.17	29.17	31.35	34.67	35.18	35.68	35.68	36.18
05:00:00	BnPAC2-Ann	93.97	93.47	92.53	92.79	100	95.19	29.95	30.46	30.46	30.46	30.46	37.97	37.97	38.5	38.5	37.97	37.97	37.97	37.43	35.19	31.5	31	31.5	31	31.5	31	31.5	32	32.12	29.53	28.93	29.53	29.53	29.53	29.17	29.17	29.17	29.17	29.17	29.17	29.17	29.17	31.89	35.68	36.68	36.68	36.68	37.19
06:00:00	AtPAC1	92.54	92.04	94.03	92.31	95.19	100	29.29	29.71	29.71	29.71	29.71	39.3	39.3	39.74	39.74	39.3	39.3	39.3	39.74	35.51	33.61	33.2	33.61	33.2	33.61	33.2	33.88	34.3	33.04	30.87	29.71	30.87	30.87	30.26	33.76	33.76	33.76	33.76	33.76	33.76	33.76	33.76	33.49	36.1	36.51	36.51	36.51	36.93
07:00:00	AtPAG1	27.89	27.37	27.37	30.46	29.95	29.29	100	98.39	98.8	99.2	99.2	28.94	29.06	26.75	26.64	27.88	28.41	29.74	30.17	29.5	30.38	31.22	30.8	31.22	31.22	30.8	31.09	31.09	28.88	28.88	28.22	28.88	28.88	28.7	28.22	30.17	30.17	30.17	27.37	30.17	30.17	30.17	23.74	28.33	28.76	28.76	28.76	28.76
08:00:00	BnPAG2-C04	28.42	27.89	27.89	29.95	30.46	29.71	98.39	100	98.8	99.2	99.2	29.31	29.44	29.31	29.74	29.74	29.74	29.74	30.17	29.5	30.38	31.22	30.8	31.22	31.22	30.8	31.09	31.09	28.57	29.44	28.75	29.44	29.44	29.26	30.34	30.6	30.6	30.6	30.34	30.6	30.6	30.6	24.29	28.33	28.76	28.76	28.76	28.76
09:00:00	BnPAG1-C04	28.42	27.89	27.89	29.95	30.46	29.71	98.8	98.8	100	99.6	99.6	29.31	29.44	29.31	29.74	29.74	29.74	29.74	30.17	29.5	30.38	31.22	30.8	31.22	31.22	30.8	31.09	31.09	29	29	28.33	29	29	28.82	29.91	30.17	30.17	30.17	29.91	30.17	30.17	30.17	24.76	28.33	28.76	28.76	28.76	28.76
10:00:00	BnPAG2-A07	28.42	27.89	27.89	29.95	30.46	29.71	99.2	99.2	99.6	100	100	29.31	29.44	29.31	29.74	29.74	29.74	29.74	30.17	29.5	30.38	31.22	30.8	31.22	31.22	30.8	31.09	31.09	29	29	28.33	29	29	28.82	29.91	30.17	30.17	30.17	29.91	30.17	30.17	30.17	24.76	28.33	28.76	28.76	28.76	28.76
11:00:00	BnPAG1-A04	28.42	27.89	27.89	29.95	30.46	29.71	99.2	99.2	99.6	100	100	29.31	29.44	29.31	29.74	29.74	29.74	29.74	30.17	29.5	30.38	31.22	30.8	31.22	31.22	30.8	31.09	31.09	29	29	28.33	29	29	28.82	29.91	30.17	30.17	30.17	29.91	30.17	30.17	30.17	24.76	28.33	28.76	28.76	28.76	28.76
12:00:00	BnPAE2-A05	35	34.44	36.67	38.5	37.97	39.3	28.94	29.31	29.31	29.31	29.31	100	100	95.49	97.89	97.47	97.47	97.05	96.62	42.14	39.57	40.43	40	40	40	39.57	39.83	39.83	34.22	31.11	30.34	31.56	31.56	30.94	32.35	32.31	32.31	32.31	32.48	32.31	32.31	32.31	32.06	37.17	36.28	36.73	36.73	36.28
13:00:00	BnPAE2-C06	35	34.44	36.67	38.5	37.97	39.3	29.06	29.44	29.44	29.44	29.44	100	100	94.4	98.31	97.88	97.88	97.46	97.03	42.14	39.57	40.43	40	40	40	39.57	39.83	39.83	34.38	31.25	30.47	31.7	31.7	31.08	31.69	32.31	32.31	32.31	32.22	32.31	32.31	32.31	31.6	37.17	36.28	36.73	36.73	36.28
14:00:00	BnPAE1-A06	35	34.44	36.67	38.5	38.5	39.74	26.75	29.31	29.31	29.31	29.31	95.49	94.4	100	95.64	85.51	87.1	97.05	96.62	42.14	40	40.87	40.43	40.43	40.43	40	40.26	40.26	34.67	31.56	30.77	32	32	31.39	27.1	31.88	31.88	31.88	27.61	31.88	31.88	31.88	31.82	37.17	36.73	36.73	36.73	36.28
15:00:00	BnPAE1-C06	35	34.44	36.67	38.5	38.5	39.74	26.64	29.74	29.74	29.74	29.74	97.89	98.31	95.64	100	88.52	89.14	98.31	97.89	42.14	40	40.87	40.43	40.43	40.43	40	40.26	40.26	34.67	31.56	30.77	32	32	31.39	30.16	31.88	31.88	31.88	30.28	31.88	31.88	31.88	32.84	37.17	36.73	36.73	36.73	36.28
16:00:00	BnPAE2-C03	35	34.44	36.67	38.5	37.97	39.3	27.88	29.74	29.74	29.74	29.74	97.47	97.88	85.51	88.52	100	89.89	98.31	97.89	42.14	39.13	40	39.57	39.57	39.57	39.13	39.39	39.39	34.22	31.11	30.34	31.56	31.56	30.94	30.43	31.88	31.88	31.88	30.16	31.88	31.88	31.88	32.35	37.17	36.28	36.73	36.73	36.28
17:00:00	BnPAE1-A08	35	34.44	36.67	38.5	37.97	39.3	28.41	29.74	29.74	29.74	29.74	97.47	97.88	87.1	89.14	89.89	100	98.31	97.89	42.14	39.13	40	39.57	39.57	39.57	39.13	39.39	39.39	34.22	31.11	30.34	31.56	31.56	30.94	29.69	31.88	31.88	31.88	29.8	31.88	31.88	31.88	32.35	37.17	36.28	36.73	36.73	36.28
18:00:00	AtPAE1	35	34.44	36.67	38.5	37.97	39.3	29.74	29.74	29.74	29.74	29.74	97.05	97.46	97.05	98.31	98.31	98.31	100	98.73	42.14	39.13	40	39.57	39.57	39.57	39.13	39.39	39.39	34.22	31.11	30.34	31.56	31.56	30.94	32.03	32.31	32.31	32.31	32.03	32.31	32.31	32.31	32.84	37.61	36.73	37.17	37.17	36.73
19:00:00	AtPAE2	35.56	35	37.22	39.04	37.43	39.74	30.17	30.17	30.17	30.17	30.17	96.62	97.03	96.62	97.89	97.89	97.89	98.73	100	42.14	39.13	40	39.57	39.57	39.57	39.13	39.39	39.39	33.78	31.11	30.34	31.56	31.56	30.94	31.6	31.88	31.88	31.88	31.6	31.88	31.88	31.88	32.84	37.17	36.28	36.73	36.73	36.28
20:00:00	BnPAF2-C02	35.29	35.29	34.83	36.11	35.19	35.51	29.5	29.5	29.5	29.5	29.5	42.14	42.14	42.14	42.14	42.14	42.14	42.14	42.14	100	85.61	85.61	87.05	87.05	87.05	85.61	84.29	84.29	33.81	33.09	33.09	33.09	33.09	33.09	31.65	31.65	31.65	30.94	31.65	31.65	31.65	31.65	34.19	37.96	37.96	37.23	37.23	36.5
21:00:00	BnPAF2-C04	30.05	30.05	32.81	32.5	31.5	33.61	30.38	30.38	30.38	30.38	30.38	39.57	39.57	40	40	39.13	39.13	39.13	39.13	85.61	100	95.54	94.8	96.28	95.91	91.11	92.83	92.45	31	30.57	29.83	30.57	30.57	29.96	35.34	35.34	35.34	34.91	35.34	35.34	35.34	35.34	27.83	33.2	33.61	32.38	32.38	31.97
22:00:00	AtPAF1	29.53	29.53	32.29	32	31	33.2	31.22	31.22	31.22	31.22	31.22	40.43	40.43	40.87	40.87	40	40	40	40	85.61	95.54	100	93.73	95.31	93.45	91.64	94.07	93.7	30.57	30.57	29.41	30.13	30.13	29.52	35.34	35.34	35.34	34.91	35.34	35.34	35.34	35.34	27.83	33.88	33.88	32.65	32.65	32.65
23:00:00	BnPAF2-A02	29.53	29.53	32.29	32.5	31.5	33.61	30.8	30.8	30.8	30.8	30.8	40	40	40.43	40.43	39.57	39.57	39.57	39.57	87.05	94.8	93.73	100	95.2	95.2	90.74	91.7	91.32	31.44	31	30.25	31	31	30.4	35.34	35.34	35.34	34.91	35.34	35.34	35.34	35.34	27.95	33.2	33.61	32.38	32.38	31.97
1 day, 0:00:00	BnPAF1-C09	29.02	29.02	31.77	32	31	33.2	31.22	31.22	31.22	31.22	31.22	40	40	40.43	40.43	39.57	39.57	39.57	39.57	87.05	96.28	95.31	95.2	100	97.09	90.18	93.33	92.96	31.44	31	30.25	31	31	30.4	35.34	35.34	35.34	34.91	35.34	35.34	35.34	35.34	27.83	32.65	32.65	32.24	32.24	31.43
1 day, 1:00:00	BnPAF1-A09	29.53	29.53	32.29	32.5	31.5	33.61	31.22	31.22	31.22	31.22	31.22	40	40	40.43	40.43	39.57	39.57	39.57	39.57	87.05	95.91	93.45	95.2	97.09	100	89.38	91.79	91.42	31.44	31	30.25	31	31	30.4	35.34	35.34	35.34	34.91	35.34	35.34	35.34	35.34	27.95	33.2	33.2	32.38	32.38	31.97
1 day, 2:00:00	AtPAF2	29.53	29.53	32.29	32	31	33.2	30.8	30.8	30.8	30.8	30.8	39.57	39.57	40	40	39.13	39.13	39.13	39.13	85.61	91.11	91.64	90.74	90.18	89.38	100	95.22	94.85	31.44	31.44	30.25	31	31	30.4	34.48	34.48	34.48	34.05	34.48	34.48	34.48	34.48	29.44	33.88	34.29	33.06	33.06	33.06
1 day, 3:00:00	BnPAF1-A08	30.05	30.05	33.16	32.5	31.5	33.88	31.09	31.09	31.09	31.09	31.09	39.83	39.83	40.26	40.26	39.39	39.39	39.39	39.39	84.29	92.83	94.07	91.7	93.33	91.79	95.22	100	99.27	31.3	31.3	30.13	30.87	30.87	30.26	35.62	35.62	35.62	35.19	35.62	35.62	35.62	35.62	29.07	33.88	34.3	33.88	33.88	33.06
1 day, 4:00:00	BnPAF1-C08	30.57	30.57	33.68	33	32	34.3	31.09	31.09	31.09	31.09	31.09	39.83	39.83	40.26	40.26	39.39	39.39	39.39	39.39	84.29	92.45	93.7	91.32	92.96	91.42	94.85	99.27	100	31.74	31.74	30.54	31.3	31.3	30.7	35.62	35.62	35.62	35.19	35.62	35.62	35.62	35.62	29.52	34.3	34.71	34.3	34.3	33.47
1 day, 5:00:00	AtPAA1	28.65	28.65	30.94	32.12	32.12	33.04	28.88	28.57	29	29	29	34.22	34.38	34.67	34.67	34.22	34.22	34.22	33.78	33.81	31	30.57	31.44	31.44	31.44	31.44	31.3	31.74	100	91.46	90.65	91.06	91.06	90.57	35.37	35.84	35.84	35.4	35.37	35.84	35.84	35.84	33.66	37.61	37.61	36.73	36.73	36.73
1 day, 6:00:00	AtPAA2	27.03	27.03	30.94	30.05	29.53	30.87	28.88	29.44	29	29	29	31.11	31.25	31.56	31.56	31.11	31.11	31.11	31.11	33.09	30.57	30.57	31	31	31	31.44	31.3	31.74	91.46	100	95.12	96.75	96.75	96.31	34.5	34.96	34.96	34.51	34.5	34.96	34.96	34.96	33.17	36.73	36.73	35.84	35.84	36.28
1 day, 7:00:00	BnPAA1-A03	26.32	26.32	29.47	29.44	28.93	29.71	28.22	28.75	28.33	28.33	28.33	30.34	30.47	30.77	30.77	30.34	30.34	30.34	30.34	33.09	29.83	29.41	30.25	30.25	30.25	30.25	30.13	30.54	90.65	95.12	100	98.37	98.37	98.77	33.19	33.62	34.04	33.19	33.19	33.62	33.62	33.62	32.56	35.59	35.59	34.75	34.75	35.17
1 day, 8:00:00	BnPAA2-C07	27.03	27.03	30.94	30.05	29.53	30.87	28.88	29.44	29	29	29	31.56	31.7	32	32	31.56	31.56	31.56	31.56	33.09	30.57	30.13	31	31	31	31	30.87	31.3	91.06	96.75	98.37	100	100	99.59	34.06	34.51	34.96	34.07	34.06	34.51	34.51	34.51	33.17	36.28	36.28	35.4	35.4	35.84
1 day, 9:00:00	BnPAA2-A07	27.03	27.03	30.94	30.05	29.53	30.87	28.88	29.44	29	29	29	31.56	31.7	32	32	31.56	31.56	31.56	31.56	33.09	30.57	30.13	31	31	31	31	30.87	31.3	91.06	96.75	98.37	100	100	99.59	34.06	34.51	34.96	34.07	34.06	34.51	34.51	34.51	33.17	36.28	36.28	35.4	35.4	35.84
1 day, 10:00:00	BnPAA1-C03	27.03	27.03	30.17	30.05	29.53	30.26	28.7	29.26	28.82	28.82	28.82	30.94	31.08	31.39	31.39	30.94	30.94	30.94	30.94	33.09	29.96	29.52	30.4	30.4	30.4	30.4	30.26	30.7	90.57	96.31	98.77	99.59	99.59	100	33.92	34.38	34.82	33.93	33.92	34.38	34.38	34.38	33	36.16	36.16	35.27	35.27	35.71
1 day, 11:00:00	BnPAB2-A07	25.41	24.86	32.43	29.17	29.17	33.76	28.22	30.34	29.91	29.91	29.91	32.35	31.69	27.1	30.16	30.43	29.69	32.03	31.6	31.65	35.34	35.34	35.34	35.34	35.34	34.48	35.62	35.62	35.37	34.5	33.19	34.06	34.06	33.92	100	99.15	98.72	98.3	94.14	99.15	99.15	99.15	34.07	39.57	39.57	39.57	39.57	39.57
1 day, 12:00:00	BnPAB1-A07	25.41	24.86	32.43	29.17	29.17	33.76	30.17	30.6	30.17	30.17	30.17	32.31	32.31	31.88	31.88	31.88	31.88	32.31	31.88	31.65	35.34	35.34	35.34	35.34	35.34	34.48	35.62	35.62	35.84	34.96	33.62	34.51	34.51	34.38	99.15	100	99.57	98.3	98.72	99.15	99.15	99.15	35.92	39.57	39.57	39.57	39.57	39.57
1 day, 13:00:00	BnPAB1-C06	25.41	24.86	32.43	29.17	29.17	33.76	30.17	30.6	30.17	30.17	30.17	32.31	32.31	31.88	31.88	31.88	31.88	32.31	31.88	31.65	35.34	35.34	35.34	35.34	35.34	34.48	35.62	35.62	35.84	34.96	34.04	34.96	34.96	34.82	98.72	99.57	100	97.87	98.3	98.72	98.72	98.72	35.92	39.57	39.13	39.57	39.57	39.57
1 day, 14:00:00	AtPAB2	25.41	24.86	32.43	29.17	29.17	33.76	30.17	30.6	30.17	30.17	30.17	32.31	32.31	31.88	31.88	31.88	31.88	32.31	31.88	30.94	34.91	34.91	34.91	34.91	34.91	34.05	35.19	35.19	35.4	34.51	33.19	34.07	34.07	33.93	98.3	98.3	97.87	100	98.72	99.15	99.15	99.15	35.92	39.57	39.57	39.57	39.57	39.57
1 day, 15:00:00	BnPAB2-C06	25.41	24.86	32.43	29.17	29.17	33.76	27.37	30.34	29.91	29.91	29.91	32.48	32.22	27.61	30.28	30.16	29.8	32.03	31.6	31.65	35.34	35.34	35.34	35.34	35.34	34.48	35.62	35.62	35.37	34.5	33.19	34.06	34.06	33.92	94.14	98.72	98.3	98.72	100	99.57	99.57	99.57	34.23	39.57	39.57	39.57	39.57	39.57
1 day, 16:00:00	BnPAB1-C02	25.41	24.86	32.43	29.17	29.17	33.76	30.17	30.6	30.17	30.17	30.17	32.31	32.31	31.88	31.88	31.88	31.88	32.31	31.88	31.65	35.34	35.34	35.34	35.34	35.34	34.48	35.62	35.62	35.84	34.96	33.62	34.51	34.51	34.38	99.15	99.15	98.72	99.15	99.57	100	100	100	35.92	39.57	39.57	39.57	39.57	39.57
1 day, 17:00:00	BnPAB2-A02	25.41	24.86	32.43	29.17	29.17	33.76	30.17	30.6	30.17	30.17	30.17	32.31	32.31	31.88	31.88	31.88	31.88	32.31	31.88	31.65	35.34	35.34	35.34	35.34	35.34	34.48	35.62	35.62	35.84	34.96	33.62	34.51	34.51	34.38	99.15	99.15	98.72	99.15	99.57	100	100	100	35.92	39.57	39.57	39.57	39.57	39.57
1 day, 18:00:00	AtPAB1	25.41	24.86	32.43	29.17	29.17	33.76	30.17	30.6	30.17	30.17	30.17	32.31	32.31	31.88	31.88	31.88	31.88	32.31	31.88	31.65	35.34	35.34	35.34	35.34	35.34	34.48	35.62	35.62	35.84	34.96	33.62	34.51	34.51	34.38	99.15	99.15	98.72	99.15	99.57	100	100	100	35.92	39.57	39.57	39.57	39.57	39.57
1 day, 19:00:00	BnPAD1-C09	29.94	29.94	30.56	31.35	31.89	33.49	23.74	24.29	24.76	24.76	24.76	32.06	31.6	31.82	32.84	32.35	32.35	32.84	32.84	34.19	27.83	27.83	27.95	27.83	27.95	29.44	29.07	29.52	33.66	33.17	32.56	33.17	33.17	33	34.07	35.92	35.92	35.92	34.23	35.92	35.92	35.92	100	79.55	79.09	78.18	78.64	79.09
1 day, 20:00:00	AtPAD2	34.38	34.38	34.38	34.67	35.68	36.1	28.33	28.33	28.33	28.33	28.33	37.17	37.17	37.17	37.17	37.17	37.17	37.61	37.17	37.96	33.2	33.88	33.2	32.65	33.2	33.88	33.88	34.3	37.61	36.73	35.59	36.28	36.28	36.16	39.57	39.57	39.57	39.57	39.57	39.57	39.57	39.57	79.55	100	95.2	94	94.4	94.8
1 day, 21:00:00	AtPAD1	34.38	34.38	34.38	35.18	36.68	36.51	28.76	28.76	28.76	28.76	28.76	36.28	36.28	36.73	36.73	36.28	36.28	36.73	36.28	37.96	33.61	33.88	33.61	32.65	33.2	34.29	34.3	34.71	37.61	36.73	35.59	36.28	36.28	36.16	39.57	39.57	39.13	39.57	39.57	39.57	39.57	39.57	79.09	95.2	100	95.6	96	95.6
1 day, 22:00:00	BnPAD2-C08	34.9	34.9	34.9	35.68	36.68	36.51	28.76	28.76	28.76	28.76	28.76	36.73	36.73	36.73	36.73	36.73	36.73	37.17	36.73	37.23	32.38	32.65	32.38	32.24	32.38	33.06	33.88	34.3	36.73	35.84	34.75	35.4	35.4	35.27	39.57	39.57	39.57	39.57	39.57	39.57	39.57	39.57	78.18	94	95.6	100	99.6	97.6
1 day, 23:00:00	BnPAD1-A09	34.9	34.9	34.9	35.68	36.68	36.51	28.76	28.76	28.76	28.76	28.76	36.73	36.73	36.73	36.73	36.73	36.73	37.17	36.73	37.23	32.38	32.65	32.38	32.24	32.38	33.06	33.88	34.3	36.73	35.84	34.75	35.4	35.4	35.27	39.57	39.57	39.57	39.57	39.57	39.57	39.57	39.57	78.64	94.4	96	99.6	100	98
2 days, 0:00:00	BnPAD2-A03	35.42	35.42	34.9	36.18	37.19	36.93	28.76	28.76	28.76	28.76	28.76	36.28	36.28	36.28	36.28	36.28	36.28	36.73	36.28	36.5	31.97	32.65	31.97	31.43	31.97	33.06	33.06	33.47	36.73	36.28	35.17	35.84	35.84	35.71	39.57	39.57	39.57	39.57	39.57	39.57	39.57	39.57	79.09	94.8	95.6	97.6	98	100
2 days, 1:00:00	BnPAD2-C07	35.42	35.42	34.9	36.18	37.19	36.93	28.76	28.76	28.76	28.76	28.76	36.73	36.73	36.73	36.73	36.73	36.73	37.17	36.73	36.5	31.97	32.65	31.97	31.43	31.97	33.06	33.06	33.47	36.73	36.28	35.17	35.84	35.84	35.71	39.57	39.57	39.57	39.57	39.57	39.57	39.57	39.57	79.55	95.6	95.6	97.6	98	99.2
[truncated: 1 more columns]

## Sheet: ST-9
Supplementary table 9 - Amino acid sequence homology (percent identity) among the 20S proteasome beta (β) subunits of Brassica napus and Arabidopsis thaliana
		BnPBG1-A03	AtPBG1	BnPBG1-C01	BnPBG1-C04	BnPBG1-A09	BnPBG1-A09-1	BnPBG1-Cnn	AtPBF1	BnPBF1-C07	BnPBF2-A04	BnPBF2-C08	BnPBF2-A09	BnPBF1-A07	BnPBF2-Cnn	BnPBC1-Cnn	BnPBC2-Cnn	BnPBC2-Cnn-1	AtPBC2	BnPBC2-A02	AtPBC1	BnPBC2-Ann	BnPBC1Ann	BnPBC1-C07	BnPBC1-A07	BnPBC1-C05	BnPBC2-A06	BnPBD2-Cnn	BnPBD2-C04	BnPBD1-A01	AtPBD1	BnPBD1-C05	BnPBD1-A05-1	AtPBD2	BnPBD1-A05	BnPBD1-C01	BnPBD1-A01-1	BnPBD2-C08	BnPBD2-A08	BnPBE2-A03	AtPBE1	AtPBE2	BnPBE2-C05	BnPBE1-A06	BnPBE1-C08	BnPBE2-A09	BnPBE1-A08	BnPBE2-C03	BnPBA2-C07
01:00:00	BnPBG1-A03	100	86.03	90.56	92.11	91.67	90.35	89.04	18.85	18.85	18.85	18.85	18.85	18.85	18.85	13.33	10.97	10.71	13.74	12.43	13.19	12.43	12.43	13.04	13.19	13.19	13.19	14.62	14.19	17.39	16.17	16.17	16.77	15.57	15.61	15.03	15.57	15.57	15.57	18.11	16.67	16.28	15.35	15.35	15.81	15.81	15.81	15.81	18.42
02:00:00	AtPBG1	86.03	100	92.28	93.06	93.06	93.06	92.65	20.19	20.19	20.19	20.19	20.19	20.19	20.19	12.5	11.88	11.61	17.09	15.59	16.08	15.05	15.05	15.92	16.08	16.08	16.08	15.68	17.58	20.65	19.02	19.02	19.02	18.48	17.89	18.42	19.02	18.48	18.48	19.38	18.14	17.83	16.96	16.96	17.39	17.39	17.39	17.39	19.81
03:00:00	BnPBG1-C01	90.56	92.28	100	98.37	98.78	96.33	95.1	19.71	19.71	19.71	19.71	19.71	19.71	19.71	11.25	10.62	10.97	16.08	14.52	15.08	13.98	13.98	14.93	15.08	15.08	15.08	15.68	16.97	20	19.02	19.02	19.02	18.48	17.89	18.42	19.02	18.48	18.48	18.6	17.6	17.28	16.87	16.87	17.28	17.28	17.28	17.28	19.81
04:00:00	BnPBG1-C04	92.11	93.06	98.37	100	98.78	97.14	95.92	19.23	19.23	19.23	19.23	19.23	19.23	19.23	11.25	10.62	10.97	16.08	14.52	15.08	13.98	13.98	14.93	15.08	15.08	15.08	15.68	16.97	20	19.02	19.02	19.02	18.48	17.89	18.42	19.02	18.48	18.48	18.6	17.37	17.47	16.59	16.59	17.03	17.03	17.03	17.03	19.81
05:00:00	BnPBG1-A09	91.67	93.06	98.78	98.78	100	96.73	95.51	19.71	19.71	19.71	19.71	19.71	19.71	19.71	11.25	10.62	10.97	16.08	14.52	15.08	13.98	13.98	14.93	15.08	15.08	15.08	15.68	16.97	20	19.02	19.02	19.02	18.48	17.89	18.42	19.02	18.48	18.48	18.6	17.37	17.47	16.59	16.59	17.03	17.03	17.03	17.03	19.81
06:00:00	BnPBG1-A09-1	90.35	93.06	96.33	97.14	96.73	100	97.96	19.71	19.71	19.71	19.71	19.71	19.71	19.71	11.25	10.62	10.32	16.08	14.52	15.08	13.98	13.98	14.93	15.08	15.08	15.08	16.22	17.58	20.65	19.57	19.57	19.57	19.02	18.42	18.95	19.57	19.02	19.02	18.6	17.37	17.47	16.59	16.59	17.03	17.03	17.03	17.03	19.81
07:00:00	BnPBG1-Cnn	89.04	92.65	95.1	95.92	95.51	97.96	100	19.23	19.23	19.23	19.23	19.23	19.23	19.23	11.25	10.62	10.32	16.08	14.52	15.08	13.98	13.98	14.93	15.08	15.08	15.08	15.68	16.97	20	19.02	19.02	19.02	18.48	17.89	18.42	19.02	18.48	18.48	18.6	17.37	17.9	17.03	17.03	17.47	17.47	17.47	17.47	19.81
08:00:00	AtPBF1	18.85	20.19	19.71	19.23	19.71	19.71	19.23	100	94.17	94.62	95.07	95.07	94.17	94.62	28.4	24.39	23.27	26.11	27.37	28.08	27.37	27.37	27.32	28.08	28.08	28.08	17.13	19.88	23.18	20.56	21.11	21.11	21.67	20.43	20.43	21.67	21.11	21.11	26.56	21.63	22.39	22.89	22.89	22.39	22.39	22.89	22.89	22.68
09:00:00	BnPBF1-C07	18.85	20.19	19.71	19.23	19.71	19.71	19.23	94.17	100	99.55	97.31	97.31	97.76	98.21	28.4	24.39	23.9	26.11	26.84	27.59	26.84	26.84	26.83	27.59	27.59	27.59	16.57	19.25	22.52	20	20.56	20.56	21.11	19.89	19.89	21.11	20.56	20.56	26.56	22.12	22.89	23.38	23.38	22.89	22.89	23.38	23.38	22.68
10:00:00	BnPBF2-A04	18.85	20.19	19.71	19.23	19.71	19.71	19.23	94.62	99.55	100	97.76	97.76	98.21	98.65	28.4	24.39	23.9	26.11	26.84	27.59	26.84	26.84	26.83	27.59	27.59	27.59	16.57	19.25	22.52	20	20.56	20.56	21.11	19.89	19.89	21.11	20.56	20.56	26.56	22.12	22.89	23.38	23.38	22.89	22.89	23.38	23.38	22.68
11:00:00	BnPBF2-C08	18.85	20.19	19.71	19.23	19.71	19.71	19.23	95.07	97.31	97.76	100	100	99.1	98.65	28.4	23.78	23.27	25.62	26.32	27.09	26.32	26.32	26.34	27.09	27.09	27.09	17.68	20.5	23.84	21.11	21.67	21.67	22.22	20.97	20.97	22.22	21.67	21.67	27.34	21.63	22.39	22.39	22.39	22.39	22.39	22.39	22.39	22.68
12:00:00	BnPBF2-A09	18.85	20.19	19.71	19.23	19.71	19.71	19.23	95.07	97.31	97.76	100	100	99.1	98.65	28.4	23.78	23.27	25.62	26.32	27.09	26.32	26.32	26.34	27.09	27.09	27.09	17.68	20.5	23.84	21.11	21.67	21.67	22.22	20.97	20.97	22.22	21.67	21.67	27.34	21.63	22.39	22.39	22.39	22.39	22.39	22.39	22.39	22.68
13:00:00	BnPBF1-A07	18.85	20.19	19.71	19.23	19.71	19.71	19.23	94.17	97.76	98.21	99.1	99.1	100	99.55	28.4	23.78	23.27	25.62	26.32	27.09	26.32	26.32	26.34	27.09	27.09	27.09	17.13	19.88	23.18	20.56	21.11	21.11	21.67	20.43	20.43	21.67	21.11	21.11	26.56	21.63	22.39	22.39	22.39	22.39	22.39	22.39	22.39	22.68
14:00:00	BnPBF2-Cnn	18.85	20.19	19.71	19.23	19.71	19.71	19.23	94.62	98.21	98.65	98.65	98.65	99.55	100	28.4	23.78	23.27	25.62	26.32	27.09	26.32	26.32	26.34	27.09	27.09	27.09	17.13	19.88	23.18	20.56	21.11	21.11	21.67	20.43	20.43	21.67	21.11	21.11	26.56	22.12	22.89	22.89	22.89	22.89	22.89	22.89	22.89	22.68
15:00:00	BnPBC1-Cnn	13.33	12.5	11.25	11.25	11.25	11.25	11.25	28.4	28.4	28.4	28.4	28.4	28.4	28.4	100	79.27	75.61	75.61	79.27	78.05	78.05	79.27	79.27	79.27	79.27	79.27	13.16	12.5	19.57	14.67	16	16	16	14.81	14.81	16	16	16	19.3	18.75	18.75	18.75	18.75	18.75	18.75	18.75	18.75	7.5
16:00:00	BnPBC2-Cnn	10.97	11.88	10.62	10.62	10.62	10.62	10.62	24.39	24.39	24.39	23.78	23.78	23.78	23.78	79.27	100	86.39	83.95	87.65	85.8	86.42	87.04	87.04	87.65	87.04	87.04	14.48	14.75	16.07	15.6	16.31	16.31	16.31	14.97	15.65	15.6	16.31	16.31	19.64	20	20	21.25	21.25	20.62	20	21.25	21.25	11.41
17:00:00	BnPBC2-Cnn-1	10.71	11.61	10.97	10.97	10.97	10.32	10.32	23.27	23.9	23.9	23.27	23.27	23.27	23.27	75.61	86.39	100	84.38	86.88	85	85.62	86.25	86.25	86.25	86.25	86.25	15.94	13.93	17.86	15.6	16.31	16.31	16.31	14.29	14.97	14.89	15.6	15.6	21.9	19.35	19.48	20.13	20.13	19.48	19.48	20.13	20.13	14.58
18:00:00	AtPBC2	13.74	17.09	16.08	16.08	16.08	16.08	16.08	26.11	26.11	26.11	25.62	25.62	25.62	25.62	75.61	83.95	84.38	100	95.81	96.08	95.29	95.29	95.59	96.08	96.08	96.08	12.36	15.82	16.22	16.38	15.82	15.82	16.38	15.85	16.39	16.38	16.95	16.95	19.84	20.6	21.35	21.88	21.88	21.35	20.83	21.88	21.88	14.36
19:00:00	BnPBC2-A02	12.43	15.59	14.52	14.52	14.52	14.52	14.52	27.37	26.84	26.84	26.32	26.32	26.32	26.32	79.27	87.65	86.88	95.81	100	97.38	97.38	97.91	98.43	98.95	98.43	98.43	13.33	15.54	17.39	16.17	16.77	16.77	16.77	16.18	16.76	16.77	17.37	17.37	20.63	22.04	22.35	23.46	23.46	22.91	22.35	23.46	23.46	14.86
20:00:00	AtPBC1	13.19	16.08	15.08	15.08	15.08	15.08	15.08	28.08	27.59	27.59	27.09	27.09	27.09	27.09	78.05	85.8	85	96.08	97.38	100	97.91	98.43	98.53	98.53	99.02	99.02	13.48	15.82	16.89	16.95	16.38	16.38	16.95	16.39	16.94	16.95	17.51	17.51	19.84	20.6	21.35	21.88	21.88	21.35	20.83	21.88	21.88	15.43
21:00:00	BnPBC2-Ann	12.43	15.05	13.98	13.98	13.98	13.98	13.98	27.37	26.84	26.84	26.32	26.32	26.32	26.32	78.05	86.42	85.62	95.29	97.38	97.91	100	99.48	98.95	98.43	98.95	98.95	13.33	16.22	18.12	16.77	17.37	17.37	17.37	16.76	17.34	17.37	17.96	17.96	20.63	21.51	22.35	22.91	22.91	22.35	21.79	22.91	22.91	16
22:00:00	BnPBC1Ann	12.43	15.05	13.98	13.98	13.98	13.98	13.98	27.37	26.84	26.84	26.32	26.32	26.32	26.32	79.27	87.04	86.25	95.29	97.91	98.43	99.48	100	99.48	98.95	99.48	99.48	13.33	16.22	18.12	16.77	17.37	17.37	17.37	16.76	17.34	17.37	17.96	17.96	20.63	21.51	22.35	22.91	22.91	22.35	21.79	22.91	22.91	15.43
23:00:00	BnPBC1-C07	13.04	15.92	14.93	14.93	14.93	14.93	14.93	27.32	26.83	26.83	26.34	26.34	26.34	26.34	79.27	87.04	86.25	95.59	98.43	98.53	98.95	99.48	100	99.02	99.51	99.51	12.85	15.09	16.11	15.73	16.29	16.29	16.29	15.76	16.3	16.29	16.85	16.85	20.63	20.9	21.65	22.16	22.16	21.65	21.13	22.16	22.16	14.74
1 day, 0:00:00	BnPBC1-A07	13.19	16.08	15.08	15.08	15.08	15.08	15.08	28.08	27.59	27.59	27.09	27.09	27.09	27.09	79.27	87.65	86.25	96.08	98.95	98.53	98.43	98.95	99.02	100	99.51	99.51	12.92	15.19	16.22	15.82	16.38	16.38	16.38	15.85	16.39	16.38	16.95	16.95	20.63	21.11	21.88	22.92	22.92	22.4	21.88	22.92	22.92	14.89
1 day, 1:00:00	BnPBC1-C05	13.19	16.08	15.08	15.08	15.08	15.08	15.08	28.08	27.59	27.59	27.09	27.09	27.09	27.09	79.27	87.04	86.25	96.08	98.43	99.02	98.95	99.48	99.51	99.51	100	100	12.92	15.19	16.22	15.82	16.38	16.38	16.38	15.85	16.39	16.38	16.95	16.95	20.63	21.11	21.88	22.4	22.4	21.88	21.35	22.4	22.4	14.89
1 day, 2:00:00	BnPBC2-A06	13.19	16.08	15.08	15.08	15.08	15.08	15.08	28.08	27.59	27.59	27.09	27.09	27.09	27.09	79.27	87.04	86.25	96.08	98.43	99.02	98.95	99.48	99.51	99.51	100	100	12.92	15.19	16.22	15.82	16.38	16.38	16.38	15.85	16.39	16.38	16.95	16.95	20.63	21.11	21.88	22.4	22.4	21.88	21.35	22.4	22.4	14.89
1 day, 3:00:00	BnPBD2-Cnn	14.62	15.68	15.68	15.68	15.68	16.22	15.68	17.13	16.57	16.57	17.68	17.68	17.13	17.13	13.16	14.48	15.94	12.36	13.33	13.48	13.33	13.33	12.85	12.92	12.92	12.92	100	56.79	70.06	73.96	73.44	73.44	71.05	69.95	70.47	70.31	71.35	71.35	25	19.25	20	20	20	20	20	20	20	17.71
1 day, 4:00:00	BnPBD2-C04	14.19	17.58	16.97	16.97	16.97	17.58	16.97	19.88	19.25	19.25	20.5	20.5	19.88	19.88	12.5	14.75	13.93	15.82	15.54	15.82	16.22	16.22	15.09	15.19	15.19	15.19	56.79	100	83.33	83.72	83.14	83.72	82.63	88.2	85.96	87.79	88.37	87.21	27.19	22.16	24.38	23.75	23.75	23.75	23.75	23.75	23.75	18.86
1 day, 5:00:00	BnPBD1-A01	17.39	20.65	20	20	20	20.65	20	23.18	22.52	22.52	23.84	23.84	23.18	23.18	19.57	16.07	17.86	16.22	17.39	16.89	18.12	18.12	16.11	16.22	16.22	16.22	70.06	83.33	100	92.81	94.01	94.61	88.27	88.69	89.29	89.22	89.82	89.22	29.36	24.84	27.33	26.67	26.67	26.67	26.67	26.67	26.67	19.39
1 day, 6:00:00	AtPBD1	16.17	19.02	19.02	19.02	19.02	19.57	19.02	20.56	20	20	21.11	21.11	20.56	20.56	14.67	15.6	15.6	16.38	16.17	16.95	16.77	16.77	15.73	15.82	15.82	15.82	73.96	83.72	92.81	100	97.55	97.06	93.47	93.63	94.12	93.63	95.1	94.12	27.64	23.12	25.14	24.58	24.58	24.58	24.58	24.58	24.58	19.59
1 day, 7:00:00	BnPBD1-C05	16.17	19.02	19.02	19.02	19.02	19.57	19.02	21.11	20.56	20.56	21.67	21.67	21.11	21.11	16	16.31	16.31	15.82	16.77	16.38	17.37	17.37	16.29	16.38	16.38	16.38	73.44	83.14	94.01	97.55	100	99.51	92.46	93.14	94.12	93.63	94.61	94.12	28.46	23.66	25.7	25.14	25.14	25.14	25.14	25.14	25.14	20.1
1 day, 8:00:00	BnPBD1-A05-1	16.77	19.02	19.02	19.02	19.02	19.57	19.02	21.11	20.56	20.56	21.67	21.67	21.11	21.11	16	16.31	16.31	15.82	16.77	16.38	17.37	17.37	16.29	16.38	16.38	16.38	73.44	83.72	94.61	97.06	99.51	100	92.46	93.63	94.12	93.63	94.12	93.63	28.46	23.66	25.7	25.14	25.14	25.14	25.14	25.14	25.14	20.1
1 day, 9:00:00	AtPBD2	15.57	18.48	18.48	18.48	18.48	19.02	18.48	21.67	21.11	21.11	22.22	22.22	21.67	21.67	16	16.31	16.31	16.38	16.77	16.95	17.37	17.37	16.29	16.38	16.38	16.38	71.05	82.63	88.27	93.47	92.46	92.46	100	92.96	93.97	93.47	94.47	93.97	27.64	23.66	25.7	25.14	25.14	25.14	25.14	25.14	25.14	20.11
1 day, 10:00:00	BnPBD1-A05	15.61	17.89	17.89	17.89	17.89	18.42	17.89	20.43	19.89	19.89	20.97	20.97	20.43	20.43	14.81	14.97	14.29	15.85	16.18	16.39	16.76	16.76	15.76	15.85	15.85	15.85	69.95	88.2	88.69	93.63	93.14	93.63	92.96	100	93.93	97.55	98.04	97.06	25.58	21.35	23.24	22.7	22.7	22.7	22.7	22.7	22.7	20
1 day, 11:00:00	BnPBD1-C01	15.03	18.42	18.42	18.42	18.42	18.95	18.42	20.43	19.89	19.89	20.97	20.97	20.43	20.43	14.81	15.65	14.97	16.39	16.76	16.94	17.34	17.34	16.3	16.39	16.39	16.39	70.47	85.96	89.29	94.12	94.12	94.12	93.97	93.93	100	99.51	98.53	97.55	25.58	21.35	23.24	22.7	22.7	22.7	22.7	22.7	22.7	19.5
1 day, 12:00:00	BnPBD1-A01-1	15.57	19.02	19.02	19.02	19.02	19.57	19.02	21.67	21.11	21.11	22.22	22.22	21.67	21.67	16	15.6	14.89	16.38	16.77	16.95	17.37	17.37	16.29	16.38	16.38	16.38	70.31	87.79	89.22	93.63	93.63	93.63	93.47	97.55	99.51	100	98.04	97.06	26.02	21.51	23.46	22.91	22.91	22.91	22.91	22.91	22.91	20.1
1 day, 13:00:00	BnPBD2-C08	15.57	18.48	18.48	18.48	18.48	19.02	18.48	21.11	20.56	20.56	21.67	21.67	21.11	21.11	16	16.31	15.6	16.95	17.37	17.51	17.96	17.96	16.85	16.95	16.95	16.95	71.35	88.37	89.82	95.1	94.61	94.12	94.47	98.04	98.53	98.04	100	99.02	27.64	22.58	24.58	24.02	24.02	24.02	24.02	24.02	24.02	20.1
1 day, 14:00:00	BnPBD2-A08	15.57	18.48	18.48	18.48	18.48	19.02	18.48	21.11	20.56	20.56	21.67	21.67	21.11	21.11	16	16.31	15.6	16.95	17.37	17.51	17.96	17.96	16.85	16.95	16.95	16.95	71.35	87.21	89.22	94.12	94.12	93.63	93.97	97.06	97.55	97.06	99.02	100	27.64	22.58	24.58	24.02	24.02	24.02	24.02	24.02	24.02	20.1
1 day, 15:00:00	BnPBE2-A03	18.11	19.38	18.6	18.6	18.6	18.6	18.6	26.56	26.56	26.56	27.34	27.34	26.56	26.56	19.3	19.64	21.9	19.84	20.63	19.84	20.63	20.63	20.63	20.63	20.63	20.63	25	27.19	29.36	27.64	28.46	28.46	27.64	25.58	25.58	26.02	27.64	27.64	100	76.87	85.25	85.25	85.25	85.25	85.25	85.25	85.25	32.03
1 day, 16:00:00	AtPBE1	16.67	18.14	17.6	17.37	17.37	17.37	17.37	21.63	22.12	22.12	21.63	21.63	21.63	22.12	18.75	20	19.35	20.6	22.04	20.6	21.51	21.51	20.9	21.11	21.11	21.11	19.25	22.16	24.84	23.12	23.66	23.66	23.66	21.35	21.35	21.51	22.58	22.58	76.87	100	92.31	92.7	92.7	93.43	93.07	93.07	93.07	29.38
1 day, 17:00:00	AtPBE2	16.28	17.83	17.28	17.47	17.47	17.47	17.9	22.39	22.89	22.89	22.39	22.39	22.39	22.89	18.75	20	19.48	21.35	22.35	21.35	22.35	22.35	21.65	21.88	21.88	21.88	20	24.38	27.33	25.14	25.7	25.7	25.7	23.24	23.24	23.46	24.58	24.58	85.25	92.31	100	93.41	93.41	94.14	93.77	94.14	93.77	29.56
1 day, 18:00:00	BnPBE2-C05	15.35	16.96	16.87	16.59	16.59	16.59	17.03	22.89	23.38	23.38	22.39	22.39	22.39	22.89	18.75	21.25	20.13	21.88	23.46	21.88	22.91	22.91	22.16	22.92	22.4	22.4	20	23.75	26.67	24.58	25.14	25.14	25.14	22.7	22.7	22.91	24.02	24.02	85.25	92.7	93.41	100	99.27	99.27	98.91	98.91	98.91	29.41
1 day, 19:00:00	BnPBE1-A06	15.35	16.96	16.87	16.59	16.59	16.59	17.03	22.89	23.38	23.38	22.39	22.39	22.39	22.89	18.75	21.25	20.13	21.88	23.46	21.88	22.91	22.91	22.16	22.92	22.4	22.4	20	23.75	26.67	24.58	25.14	25.14	25.14	22.7	22.7	22.91	24.02	24.02	85.25	92.7	93.41	99.27	100	99.27	98.91	98.91	98.91	29.41
1 day, 20:00:00	BnPBE1-C08	15.81	17.39	17.28	17.03	17.03	17.03	17.47	22.39	22.89	22.89	22.39	22.39	22.39	22.89	18.75	20.62	19.48	21.35	22.91	21.35	22.35	22.35	21.65	22.4	21.88	21.88	20	23.75	26.67	24.58	25.14	25.14	25.14	22.7	22.7	22.91	24.02	24.02	85.25	93.43	94.14	99.27	99.27	100	99.64	98.91	98.91	29.41
1 day, 21:00:00	BnPBE2-A09	15.81	17.39	17.28	17.03	17.03	17.03	17.47	22.39	22.89	22.89	22.39	22.39	22.39	22.89	18.75	20	19.48	20.83	22.35	20.83	21.79	21.79	21.13	21.88	21.35	21.35	20	23.75	26.67	24.58	25.14	25.14	25.14	22.7	22.7	22.91	24.02	24.02	85.25	93.07	93.77	98.91	98.91	99.64	100	98.54	98.54	29.9
1 day, 22:00:00	BnPBE1-A08	15.81	17.39	17.28	17.03	17.03	17.03	17.47	22.89	23.38	23.38	22.39	22.39	22.39	22.89	18.75	21.25	20.13	21.88	23.46	21.88	22.91	22.91	22.16	22.92	22.4	22.4	20	23.75	26.67	24.58	25.14	25.14	25.14	22.7	22.7	22.91	24.02	24.02	85.25	93.07	94.14	98.91	98.91	98.91	98.54	100	99.27	29.41
1 day, 23:00:00	BnPBE2-C03	15.81	17.39	17.28	17.03	17.03	17.03	17.47	22.89	23.38	23.38	22.39	22.39	22.39	22.89	18.75	21.25	20.13	21.88	23.46	21.88	22.91	22.91	22.16	22.92	22.4	22.4	20	23.75	26.67	24.58	25.14	25.14	25.14	22.7	22.7	22.91	24.02	24.02	85.25	93.07	93.77	98.91	98.91	98.91	98.54	99.27	100	29.41
2 days, 0:00:00	BnPBA2-C07	18.42	19.81	19.81	19.81	19.81	19.81	19.81	22.68	22.68	22.68	22.68	22.68	22.68	22.68	7.5	11.41	14.58	14.36	14.86	15.43	16	15.43	14.74	14.89	14.89	14.89	17.71	18.86	19.39	19.59	20.1	20.1	20.11	20	19.5	20.1	20.1	20.1	32.03	29.38	29.56	29.41	29.41	29.41	29.9	29.41	29.41	100
2 days, 1:00:00	BnPBA2-A03	18.42	19.81	19.81	19.81	19.81	19.81	19.81	23.2	23.2	23.2	23.2	23.2	23.2	23.2	7.5	11.41	14.58	14.89	15.43	15.96	16.57	16	15.26	15.43	15.43	15.43	17.71	19.43	20	20.1	20.62	20.62	20.63	20.5	20	20.62	20.62	20.62	32.03	29.38	29.56	29.41	29.41	29.41	29.9	29.41	29.41	99.57
2 days, 2:00:00	AtPBA1	17.89	19.32	19.32	19.32	19.32	19.32	19.32	23.71	23.71	23.71	23.71	23.71	23.71	23.71	7.5	11.41	14.58	14.89	15.43	15.96	16.57	16	15.26	15.43	15.43	15.43	18.23	20	20.61	20.62	20.62	20.62	21.16	21	20.5	21.13	21.13	21.13	31.25	28.91	29.06	28.92	28.92	28.92	29.41	28.92	28.92	97.85
2 days, 3:00:00	BnPBA1-C01	17.89	19.32	19.32	19.32	19.32	19.32	19.32	23.2	23.2	23.2	23.2	23.2	23.2	23.2	7.5	11.41	14.58	14.89	15.43	15.96	16.57	16	15.26	15.43	15.43	15.43	18.23	20	20.61	20.62	21.13	21.13	21.16	21	20.5	21.13	21.13	21.13	31.25	28.91	29.06	28.92	28.92	28.92	29.41	28.92	28.92	98.71
2 days, 4:00:00	BnPBA2-A08	17.89	19.32	19.32	19.32	19.32	19.32	19.32	23.2	23.2	23.2	23.2	23.2	23.2	23.2	7.5	11.41	14.58	14.89	15.43	15.96	16.57	16	15.26	15.43	15.43	15.43	18.23	20	20.61	20.62	21.13	21.13	21.16	21	20.5	21.13	21.13	21.13	31.25	28.91	29.06	28.92	28.92	28.92	29.41	28.92	28.92	98.71
2 days, 5:00:00	BnPBA1-A01	17.89	19.32	19.32	19.32	19.32	19.32	19.32	23.2	23.2	23.2	23.2	23.2	23.2	23.2	7.5	11.41	14.58	14.89	15.43	15.96	16.57	16	15.26	15.43	15.43	15.43	18.23	20	20.61	20.62	21.13	21.13	21.16	21	20.5	21.13	21.13	21.13	31.25	28.91	29.06	28.92	28.92	28.92	29.41	28.92	28.92	98.71
2 days, 6:00:00	BnPBA2-C03	18.42	19.81	19.81	19.81	19.81	19.81	19.81	23.71	23.71	23.71	23.71	23.71	23.71	23.71	7.5	11.41	14.58	15.43	15.43	16.49	16.57	16	15.79	15.96	15.96	15.96	18.23	20	20.61	20.62	21.13	21.13	21.16	21	20.5	21.13	21.13	21.13	31.25	28.91	29.06	28.92	28.92	28.92	29.41	28.92	28.92	98.28
2 days, 7:00:00	AtPBB2	18.14	17.19	17.65	17.19	17.65	17.19	16.74	23.44	23.44	23.44	23.44	23.44	23.44	23.44	12.66	16.44	15.17	16.94	16.86	16.39	16.86	16.86	16.76	16.94	16.94	16.94	14.44	16.86	19.14	18.32	19.37	19.37	18.28	17.77	18.27	18.85	18.85	18.85	25.78	26.89	27.83	27.27	27.27	27.27	27.27	27.71	27.71	29.33
2 days, 8:00:00	AtPBB1	18.57	17.62	18.06	17.62	18.06	17.62	17.18	23.23	23.23	23.23	23.23	23.23	23.23	23.23	12.66	16	14.48	16.93	16.48	16.4	16.48	16.48	16.75	16.93	16.93	16.93	14.51	17.05	19.28	18.46	19.49	19.49	18.42	17.91	18.41	18.97	18.97	18.97	26.56	27.98	28.51	27.97	27.97	27.97	27.97	28.39	28.39	27.83
2 days, 9:00:00	BnPBB2-A06	18.06	17.47	17.43	17.54	17.98	17.54	17.11	22.73	22.73	22.73	22.73	22.73	22.73	22.73	12.66	16.67	15.17	17.46	17.05	16.93	17.05	17.05	17.28	17.46	17.46	17.46	13.99	17.61	19.88	18.97	20	20	18.95	18.41	18.91	19.49	19.49	19.49	25.78	27.31	26.98	26.88	26.88	26.88	26.88	27.27	27.27	28.57
2 days, 10:00:00	BnPBB2-C07	18.06	17.47	17.84	17.54	17.98	17.54	17.11	22.73	22.73	22.73	22.73	22.73	22.73	22.73	12.66	16.67	15.17	17.46	17.05	16.93	17.05	17.05	17.28	17.46	17.46	17.46	13.99	17.61	19.88	18.97	20	20	18.95	18.41	18.91	19.49	19.49	19.49	25.78	27.31	26.98	26.88	26.88	26.88	26.88	27.27	27.27	28.57
2 days, 11:00:00	BnPBB1-C02	18.06	17.47	17.62	17.54	17.98	17.54	17.11	22.73	22.73	22.73	22.73	22.73	22.73	22.73	12.66	16.67	15.17	17.46	17.05	16.93	17.05	17.05	17.28	17.46	17.46	17.46	13.99	17.61	19.88	18.97	20	20	18.95	18.41	18.91	19.49	19.49	19.49	25.78	26.72	26.77	26.67	26.67	26.67	26.67	27.06	26.67	28.26
2 days, 12:00:00	BnPBB1-A02	18.57	17.62	18.06	17.62	18.06	17.62	17.18	22.73	22.73	22.73	22.73	22.73	22.73	22.73	12.66	16.67	15.17	17.46	17.05	16.93	17.05	17.05	17.28	17.46	17.46	17.46	13.99	17.61	19.88	18.97	20	20	18.95	18.41	18.91	19.49	19.49	19.49	25.78	27.16	27.66	27.54	27.54	27.54	27.54	27.97	27.97	28.26
[truncated: 12 more columns]

[truncated: 3 more sheets: ST-10, ST-11, ST-12]
